# Supplementary material for: A Systematic Review of Taste Differences Among People With Eating Disorders
Source: PubMed Central journal article supplement (PMC6912928; doi:10.1177/1099800419872824), 2019-09-04
Supplement: Chao_19040064_toSage_SuppTbls.pdf [file Chao_19040064_toSage_SuppTbls.pdf]

**Table S1.** Participant characteristics of the reviewed literature

| Citation                                             | Total Sample | # Anorexia | # Bulimia | #BED                                                                         | #Control                                               | Age                                                                                                                                                             | BMI                                                                                                                                                            | Race/ethnicity                                                                                                                                                                                                                                                                                            | %Female | Eating Disorder Defined | Control Condition Definition                                                      | Recovery Definition | Duration of Recovery | Duration of Illness in Years (mean±SD)     | Age of Onset |
|------------------------------------------------------|--------------|------------|-----------|------------------------------------------------------------------------------|--------------------------------------------------------|-----------------------------------------------------------------------------------------------------------------------------------------------------------------|----------------------------------------------------------------------------------------------------------------------------------------------------------------|-----------------------------------------------------------------------------------------------------------------------------------------------------------------------------------------------------------------------------------------------------------------------------------------------------------|---------|-------------------------|-----------------------------------------------------------------------------------|---------------------|----------------------|--------------------------------------------|--------------|
| <i>Psychophysical Studies</i>                        |              |            |           |                                                                              |                                                        |                                                                                                                                                                 |                                                                                                                                                                |                                                                                                                                                                                                                                                                                                           |         |                         |                                                                                   |                     |                      |                                            |              |
| Arlt, Smutzer, and Chen (2017)                       | 60           | N/A        | N/A       | Normal Weight Binge Eating Disorder: 15 Overweight Binge Eating Disorder: 15 | 30 (15 normal weight controls, 15 overweight controls) | Normal Weight Control: 21.38±3.12 Normal Weight Binge Eating Disorder: 21.69±3.18 Overweight Control: 35.27±11.46 Overweight Binge Eating Disorder: 35.27±11.46 | Normal Weight Control: 21.62±1.56 Normal Weight Binge Eating Disorder: 22.29±1.88 Overweight control: 30.74± 3.26 Overweight Binge Eating Disorder: 33.06±3.39 | Normal Weight Control: 12 White, 2 Asian, 1 Hispanic Normal Weight Binge Eating Disorder: 12 White, Black/African American: 1, Asian: 2, Overweight Controls: 5 White, 9 Black/African American, and 1 Hispanic, Overweight Binge Eating Disorder: 5 White, 8 Black/African American, 1 Hispanic, 1 Other | 100%    | DSM-IV                  | Recruited through paper and online advertisements. Normal and overweight controls | N/A                 | N/A                  | N/A                                        | N/A          |
| Aschenbrenner, Scholze, Joraschky, and Hummel (2008) | 63           | 16         | 24        | N/A                                                                          | 23                                                     | 24.5±4.0                                                                                                                                                        | 14.94±2.05                                                                                                                                                     | N/A                                                                                                                                                                                                                                                                                                       | 100%    | DSM-IV and DIA-X/M-CIDI | Healthy females who didn't score positive in eating disorder questionnaire        | N/A                 | N/A                  | Anorexia Nervosa: 6.9 Bulimia Nervosa: 4.8 | N/A          |

|                                                 |     |     |     |               |     |                                                                      |                                                                                |     |      |         |                                                                                                  |                  |         |                                       |     |
|-------------------------------------------------|-----|-----|-----|---------------|-----|----------------------------------------------------------------------|--------------------------------------------------------------------------------|-----|------|---------|--------------------------------------------------------------------------------------------------|------------------|---------|---------------------------------------|-----|
| Birmingham, Wong-Crowe, Hlynsky, and Gao (2005) | 16  | N/A | N/A | N/A           | N/A | 31±13                                                                | N/A                                                                            | N/A | 100% | 100%    | N/A                                                                                              | N/A              | N/A     | N/A                                   | N/A |
| Blazer, Latzer, and Nagler (2008)               | 52  | N/A | 26  | N/A           | 26  | 24±7                                                                 | Bulimics: 22.3, No Standard Deviation<br>Controls: 21.9, No Standard Deviation | N/A | 100% | DSM-IV  | Healthy Volunteers                                                                               | N/A              | N/A     | N/A                                   | N/A |
| Bossert et al. (1991)                           | 33  | 7   | 17  | N/A           | 9   | Anorexia: 21.9±2.9<br>Bulimia Nervosa: 21.7±2.9<br>Control: 22.3±1.2 | N/A                                                                            | N/A | 100% | DSM-III | Healthy women that were examined at their maximum amount of weight loss after a four-week period | Behavior therapy | 8 Weeks | Anorexia: 4.4±3.4<br>Bulimia: 5.5±2.9 | N/A |
| Dalton and Finlayson (2014)                     | N/A | N/A | N/A | Not Specified | N/A | N/A                                                                  | Lean and obese participants                                                    | N/A | 100% | DSM-V   | N/A                                                                                              | N/A              | N/A     | N/A                                   | N/A |

|                                                         |    |     |                                |     |    |                                                                                                        |                                                                                                                |     |                                                                       |         |                                                                                                                  |                                                                                                             |             |     |     |
|---------------------------------------------------------|----|-----|--------------------------------|-----|----|--------------------------------------------------------------------------------------------------------|----------------------------------------------------------------------------------------------------------------|-----|-----------------------------------------------------------------------|---------|------------------------------------------------------------------------------------------------------------------|-------------------------------------------------------------------------------------------------------------|-------------|-----|-----|
| Dazzi, Nitto, Zambetti, Lorio, and Ciofalo (2013)       | 56 | 18  | 19                             | N/A | 19 | Eating Disorder Group: 26.7±2.0<br>Control: 27.6 (no Standard Deviation)                               | Anorexia Nervosa: 15.74<br>Bulimia Nervosa: 22.07                                                              | N/A | Eating Disorder Group: 100% female<br><br>Control: 14/19 female (74%) | DSM-IV  | Medical students with no taste & smell disorders, ear, nose and throat diseases, or eating/psychiatric disorders | N/A                                                                                                         | N/A         | N/A | N/A |
| Drewnowski, Bellisle, Aimez, and Remy (1987)            | 32 | N/A | 16                             | N/A | 16 | Bulimia Nervosa: 26.7±2.0<br>Control: 28.9±1.8                                                         | Bulimia Nervosa: 20.7±0.3<br>Control: 20.9±0.6                                                                 | N/A | 100%                                                                  | DSM-III | No Eating Disorders; recruited among students from University of Paris                                           | N/A                                                                                                         | N/A         | N/A | N/A |
| Drewnowski, Halmi, Pierce, Gibbs, and Smith (1987)      | 48 | 12  | 20 (13 Anorectic<br>7 Bulimic) | N/A | 16 | Anorexic Restrictor: 16.3±2.2<br>Anorectic-Bulimic: 19.5±4.2<br>Bulimic: 19.4±2.5<br>Control: 19.1±0.8 | Anorexia Nervosa-Restrictor: 14.8±1.6<br>Anorectic-Bulimic: 16.2±2.3<br>Bulimic: 21.3±2.0<br>Control: 21.1±1.6 | N/A | 100%                                                                  | DSM-III | Normal-weight females and free of Eating disorders; recruited from university campus                             | Liquid diet given to ensure patient gained 2 lb/week until patient reached target weight of 50th percentile | Eight Weeks | N/A | N/A |
| Drewnowski, Krahn, Demitrack, Nairn, and Gosnell (1992) | 26 | N/A | N/A                            | 14  | 12 | Binge Eating Disorder: 26.3±2.0<br>Control: 31.9±2.0                                                   | Binge Eating Disorder: 30.9±2.2<br>Control: 22.7±0.6                                                           | N/A | 100%                                                                  | DSM-III | Recruited through advertisements and had no history of eating disorders                                          | N/A                                                                                                         | N/A         | N/A | N/A |

|                                                         |    |                                                      |              |     |     |                                                                                                                                 |                                                                                       |     |      |             |                                                                                                                                              |     |     |                                                                                                                                  |     |
|---------------------------------------------------------|----|------------------------------------------------------|--------------|-----|-----|---------------------------------------------------------------------------------------------------------------------------------|---------------------------------------------------------------------------------------|-----|------|-------------|----------------------------------------------------------------------------------------------------------------------------------------------|-----|-----|----------------------------------------------------------------------------------------------------------------------------------|-----|
| Drewnowski, Krahn, Demitrack, Nairn, and Gosnell (1995) | 41 | N/A                                                  | N/A          | 20  | 21  | Obese: 28.1±7.0<br>Lean: 27.4±8.0<br>Binge Eaters: 25.4±7.4<br>Non-Bingers: 29.8±7.3                                            | Binge Eaters: 29.2±7.9<br>Non-Bingers: 26.4±6.3<br>Obese: 35.1±6.0<br>Lean: 23.0±2.0  | N/A | 100% | DSMIII & IV | 41 participants total. Of these participants, there was overlap between non-bingers (21) and Lean individuals (25)                           | N/A | N/A | N/A                                                                                                                              | N/A |
| Eiber, Berlin, de Brettes, Foulon, and Guelfi (2002)    | 60 | Restrictive Anorectics: 20<br>Anorectic-bulimics: 20 | Bulimics: 20 | N/A | N/A | Restrictive-Anorectics: 23.3±4.8<br>Bulimics: 26.4±5.5<br>Anorectic-Bulimics: 26.4±5.5                                          | Restrictive-Anorexics: 15.7±1.6<br>Bulimics: 22.7±2.7<br>Anorectic-Bulimics: 16.3±1.3 | N/A | 100% | DSM-IV      | N/A                                                                                                                                          | N/A | N/A | N/A                                                                                                                              | N/A |
| Franko, Wolfe, and Jimerson (1994)                      | 40 | N/A                                                  | 20           | N/A | 20  | Bulimia Nervosa with a history of Anorexia: 25±4<br>Bulimia Nervosa with no history of Anorexia: 24±5<br>Healthy Controls: 24±4 | N/A                                                                                   | N/A | 100% | DSM III-R   | Controls selected based on absence of personal history or family history of eating disorders, other major psychiatric disorders, and obesity | N/A | N/A | Bulimia Nervosa with history of Anorexia: 10±6<br>Bulimia Nervosa with no history of anorexia: 6±5<br>Overall average of BN: 7±5 | N/A |

|                                                            |    |     |     |     |    |                                                                     |                                                          |     |      |                                         |                                                                                 |     |     |                             |     |
|------------------------------------------------------------|----|-----|-----|-----|----|---------------------------------------------------------------------|----------------------------------------------------------|-----|------|-----------------------------------------|---------------------------------------------------------------------------------|-----|-----|-----------------------------|-----|
| Goldzak-Kunik, Friedman, Spitz, Sandler, and Leshem (2012) | 30 | 15  | N/A | N/A | 15 | Control:<br>15.0±0.48<br>Anorexic:<br>15.8±0.34                     | Control:<br>19.4±0.58<br>Anorexic:<br>17.2±0.50          | N/A | 93%  | Diagnosed by inpatient medical team     | Healthy group consisting of 14 Females and 1 Male below the 65th BMI percentile | N/A | N/A | N/A                         | N/A |
| Jirik-Babb and Katz (1988)                                 | 21 | 9   | 5   | N/A | 7  | N/A                                                                 | N/A                                                      | N/A | 100% | DSM-III                                 | Age-matched, non-hospitalized, normal-weight, non-eating disordered women       | N/A | N/A | N/A                         | N/A |
| Klein, Schebendach, Gershkovich, Smith, and Walsh (2010)   | 24 | N/A | 13  | N/A | 11 | Bulimia Nervosa:<br>24.45±1.55<br>Control:<br>26.7±1.4              | Bulimia Nervosa:<br>22.46±0.83<br>Control:<br>21.01±0.66 | N/A | 100% | Met DSM-IV criteria for Bulimia Nervosa | Healthy women with no history of an eating disorder                             | N/A | N/A | Bulimia Nervosa:<br>9.7±2.3 | N/A |
| Lacey, Stanley, Crutchfield, and Crisp (1977)              | 12 | 6   | N/A | N/A | 6  | Anorexia Nervosa:<br>245.4<br>months±60.9<br>Control:<br>253.2±83.2 | N/A                                                      | N/A | 100% | N/A                                     | Healthy female nurses                                                           | N/A | N/A | N/A                         | N/A |

|                                  |    |    |     |     |     |                                                         |                                                               |          |      |                                                                                             |                                              |     |     |           |     |
|----------------------------------|----|----|-----|-----|-----|---------------------------------------------------------|---------------------------------------------------------------|----------|------|---------------------------------------------------------------------------------------------|----------------------------------------------|-----|-----|-----------|-----|
| Nakai, Kinoshita, and Koh (1987) | 36 | 23 | 13  | N/A | N/A | Anorexia Nervosa: 19.3±4.0<br>Bulimia Nervosa: 21.5±4.0 | IBW: Anorexia Nervosa - 70.9±4.8<br>Bulimia Nervosa - 88±11.2 | Japanese | 100% | Research Group for Intractable Disease from the Ministry of the Health and Welfare of Japan | N/A                                          | N/A | N/A | N/A       | N/A |
| Nozoe et al. (1996)              | 15 | 9  | N/A | N/A | 6   | Anorexia Nervosa: 19.3±3.8                              | N/A                                                           | Japanese | 100% | Research Group for Intractable Disease from the Ministry of the Health and Welfare of Japan | Healthy females who were Age and sex matched | N/A | N/A | 21.4±11.1 | N/A |

|                        |    |     |     |     |    |            |            |                     |      |                                               |                                                                                                                                                                                                                                                                                                                                                                                                          |     |     |     |     |
|------------------------|----|-----|-----|-----|----|------------|------------|---------------------|------|-----------------------------------------------|----------------------------------------------------------------------------------------------------------------------------------------------------------------------------------------------------------------------------------------------------------------------------------------------------------------------------------------------------------------------------------------------------------|-----|-----|-----|-----|
| Peterson et al. (2016) | 30 | N/A | N/A | N/A | 15 | 15.27±1.91 | 17.69±2.28 | White, Non-Hispanic | 100% | Inpatient Medical Care team; No DSM mentioned | Healthy female controls with no eating disorder. Must have low BMI percentile for age and height and stable body weight. Controls were matched to the eating disorder group on age (±6 months ED girls' age), age at menarche (age at menarche ± 12 months of eating disorder girl's age at menarche), race, weight (BMI percentile within 20% of eating Disorder match), and socioeconomic status (SES) | N/A | N/A | N/A | N/A |
|------------------------|----|-----|-----|-----|----|------------|------------|---------------------|------|-----------------------------------------------|----------------------------------------------------------------------------------------------------------------------------------------------------------------------------------------------------------------------------------------------------------------------------------------------------------------------------------------------------------------------------------------------------------|-----|-----|-----|-----|

|                                               |     |                                                       |     |     |    |                                                 |                                                 |                                                                                             |      |           |                                                                                                                                   |     |     |                      |     |
|-----------------------------------------------|-----|-------------------------------------------------------|-----|-----|----|-------------------------------------------------|-------------------------------------------------|---------------------------------------------------------------------------------------------|------|-----------|-----------------------------------------------------------------------------------------------------------------------------------|-----|-----|----------------------|-----|
| Pierce, Halmi, and Sunday (1989)              | 103 | 33<br>Anorectic Restrictors, 32<br>Anorectic Bulimics | 24  | N/A | 24 | N/A                                             | N/A                                             | N/A                                                                                         | N/A  | N/A       | N/A                                                                                                                               | N/A | N/A | N/A                  | N/A |
| Rodin, Bartoshuk, Peterson, and Schank (1990) | 32  | N/A                                                   | 16  | N/A | 16 | Control: 22.6<br>Bulimic: 23.4                  | N/A                                             | N/A                                                                                         | 100% | DSM-III-R | Drawn from a random sample of age-matched volunteers. Did not differ from bulimics in race, ethnicity or SES. Subjects paid \$10. | N/A | N/A | At least three years | N/A |
| Schebendach et al. (2014)                     | 50  | 25                                                    | N/A | N/A | 25 | Anorexia Nervosa: 27.2±7.8<br>Control: 23.3±3.5 | Control: 21.1±1.6<br>Anorexia Nervosa: 17.3±2.0 | Anorexia Nervosa = 2<br>Hispanics and 23 Caucasians,<br>Normal controls were all Caucasians | 100% | DSM-V     | Healthy                                                                                                                           | N/A | N/A | N/A                  | N/A |



|                                                                     |     |                                                 |                           |     |                           |                                                                                                                                                           |                                                                                                                                                                            |     |      |           |                                                                    |                                                                                                        |           |           |     |
|---------------------------------------------------------------------|-----|-------------------------------------------------|---------------------------|-----|---------------------------|-----------------------------------------------------------------------------------------------------------------------------------------------------------|----------------------------------------------------------------------------------------------------------------------------------------------------------------------------|-----|------|-----------|--------------------------------------------------------------------|--------------------------------------------------------------------------------------------------------|-----------|-----------|-----|
| Simon, Bellisle, Monneuse, Samuel-Lajeunesse, and Drewnowski (1993) | 26  | 12                                              | N/A                       | N/A | 14                        | 26.8                                                                                                                                                      | Anorectic: 14<br>Control: 20.7                                                                                                                                             | N/A | 100% | DSM-III-R | Medical students and nursing staff at the Hospital Ste Anne, Paris | Undergoing treatment in in-patient setting but patients were not recovered                             | N/A       | 8.9 years | N/A |
| S. R. Sunday and Halmi (1990)                                       | 151 | Anorexic Restrictor: 48<br>Anorexic-Bulimic: 36 | Normal Weight Bulimic: 42 | N/A | Normal Weight Control: 26 | Anorexia Nervosa-Restrictor: 18.94±0.85<br>Anorexia Nervosa-Bulimic: 21.31±0.80<br>Normal Weight Bulimic: 21.51±0.89<br>Normal Weight Control: 19.27±0.24 | <b>Pre-BMI</b> - Anorexia Nervosa-Restrictor: 14.68±0.27<br>Anorexia Nervosa-Bulimic: 16.30±0.36<br>Normal Weight Bulimic: 20.75±0.31<br>Normal Weight Control: 20.91±0.33 | N/A | 100% | DSM-III-R | Normal weight                                                      | N/A                                                                                                    | N/A       | N/A       | N/A |
| Suzanne R. Sunday and Halmi (1991)                                  | 82  | 24 only Anorexic AND Bulimic                    | 17                        | N/A | 15                        | N/A                                                                                                                                                       | N/A                                                                                                                                                                        | N/A | N/A  | DSM-III-R | Controls had no history an eating disorder                         | Received treatment in in-patient setting, tested during first week of admission and prior to discharge | Six Weeks | N/A       | N/A |

|                      |    |                                        |     |     |                                      |                                                   |                                                 |     |     |        |                                        |                                                                                                                        |     |     |     |
|----------------------|----|----------------------------------------|-----|-----|--------------------------------------|---------------------------------------------------|-------------------------------------------------|-----|-----|--------|----------------------------------------|------------------------------------------------------------------------------------------------------------------------|-----|-----|-----|
| Szalay et al. (2010) | 22 | Anorexia Nervosa: 11 (10 women, 1 man) | N/A | N/A | Healthy Control: 11 (9 women, 2 men) | Anorexia Nervosa: 23, No SD<br>Control: 24, No SD | Anorexia Nervosa: 16.7±1.6<br>Control: 22.8±1.9 | N/A | 83% | DSM-IV | Healthy females<br>Age and sex matched | All subjects returned to normal body weight and all bulimics were free of bingeing and purging for at least four weeks | N/A | N/A | N/A |
|----------------------|----|----------------------------------------|-----|-----|--------------------------------------|---------------------------------------------------|-------------------------------------------------|-----|-----|--------|----------------------------------------|------------------------------------------------------------------------------------------------------------------------|-----|-----|-----|

*Self-Report*

|                             |                              |    |    |     |    |                                                                                                                                                                |                                                                                                                                                                              |     |      |                                                              |                                                                                            |                                                                                          |         |                                         |     |
|-----------------------------|------------------------------|----|----|-----|----|----------------------------------------------------------------------------------------------------------------------------------------------------------------|------------------------------------------------------------------------------------------------------------------------------------------------------------------------------|-----|------|--------------------------------------------------------------|--------------------------------------------------------------------------------------------|------------------------------------------------------------------------------------------|---------|-----------------------------------------|-----|
| Brand-Gothelf et al. (2016) | Study 1 - 67<br>Study 2 - 20 | 40 | 20 | N/A | 27 | Study 1 - Anorexia Nervosa-Restrictor: 17.8±5.0<br>Bulimia Nervosa-Restrictor: 22±4.7<br>Control = 18.5±4.7<br>Study 2 - Anorexia Nervosa-Restrictor: 15.7±1.6 | Study 1 - Anorexia Nervosa-Restrictor: 15.7±1.6<br>Bulimia Nervosa: 20.8±2.8<br>Control: 20.2±2.8;<br>Study 2 - Time of admission: 15.3± 1.6,<br>Time of discharge: 19.6±1.7 | N/A | 100% | Eating Disorders Family History Interview (EDFHI) and DSM-IV | Between Ages 15-25, matched for age, years of schooling, ethnic origin, and catchment area | Group of Anorexics (n = 20) assessed on admission and discharge after weight restoration | 2 weeks | Anorexics: 2.2±1.1<br>Bulimics: 2.6±3.2 | N/A |
|-----------------------------|------------------------------|----|----|-----|----|----------------------------------------------------------------------------------------------------------------------------------------------------------------|------------------------------------------------------------------------------------------------------------------------------------------------------------------------------|-----|------|--------------------------------------------------------------|--------------------------------------------------------------------------------------------|------------------------------------------------------------------------------------------|---------|-----------------------------------------|-----|

|                                                                                   |     |     |     |     |                                                                                                          |                                                                                                                                               |                                                                                                                                              |                                                                                |      |                        |                                                                                                                 |                                                                                    |     |     |     |
|-----------------------------------------------------------------------------------|-----|-----|-----|-----|----------------------------------------------------------------------------------------------------------|-----------------------------------------------------------------------------------------------------------------------------------------------|----------------------------------------------------------------------------------------------------------------------------------------------|--------------------------------------------------------------------------------|------|------------------------|-----------------------------------------------------------------------------------------------------------------|------------------------------------------------------------------------------------|-----|-----|-----|
| Koritar, Philippi, and Alvarenga (2017).                                          | 243 | N/A | 27  | N/A | College students without eating disorder risk: 162<br><br>College students with eating disorder risk: 54 | Bulimia Nervosa: 26.2±6.9<br>College students without eating disorder risk: 21.9±4.3<br>College students with eating disorder risk: 21.8± 2.6 | Bulimia Nervosa: 27.5±6.6<br>College students without eating disorder risk: 22.4±3.8<br>College students with eating disorder risk: 23.7±3.5 | N/A                                                                            | 100% | DSM-IV                 | Recruited 216 healthy samples who took an eating disorder survey (EAT-26)                                       | N/A                                                                                | N/A | N/A | N/A |
| Mitchell et al. (1999)                                                            | 78  | N/A | 29  | 49  | N/A                                                                                                      | Bulimia Nervosa: 26<br>Binge Eating Disorder: 42                                                                                              | Bulimia Nervosa: 23.5<br>Binge Eating Disorder: 34.3                                                                                         | Bulimia Nervosa: 93.1%<br>Caucasian<br>Binge Eating Disorder: 98%<br>Caucasian | 100% | DSM-IV patient version | N/A                                                                                                             | Receiving Cognitive Behavioral Therapy for Binge Eating Disorder but not recovered | N/A | N/A | N/A |
| Monje Moreno, Alvarez Amor, Ruiz-Prieto, Bolanos-Rios, and Jauregui-Lobera (2014) | 38  | 23  | N/A | N/A | 15                                                                                                       | 21.34±4.96                                                                                                                                    | N/A                                                                                                                                          | N/A                                                                            | 100% | DSM-IV                 | Students recruited from the Pablo de Olavide University, Seville. Students did not have any psychiatric history | N/A                                                                                | N/A | N/A | N/A |

|                                                       |    |                                                                                                                       |                    |     |                         |                                                                      |                                                                      |                                                            |                                                               |                                              |                                                                                                                                                       |                                                              |                                                 |                  |     |  |
|-------------------------------------------------------|----|-----------------------------------------------------------------------------------------------------------------------|--------------------|-----|-------------------------|----------------------------------------------------------------------|----------------------------------------------------------------------|------------------------------------------------------------|---------------------------------------------------------------|----------------------------------------------|-------------------------------------------------------------------------------------------------------------------------------------------------------|--------------------------------------------------------------|-------------------------------------------------|------------------|-----|--|
| Steinglass, Foerde, Kostro, Shohamy, and Walsh (2015) | 42 | 21 (Data from one individual with AN were excluded from analyses due to failure to understand the task instructions.) | N/A                | N/A | 20                      | Control: 26.3±5.8<br>Anorectic: 29.4±11.2                            | N/A                                                                  | N/A                                                        | 95% females in control group; 95.2% females in anorexic group | DSM-V                                        | Healthy controls had no current or past psychiatric illness, including any history of an eating disorder, and had a BMI greater than or equal to 18.5 | Undergoing treatment in in-patient setting but not recovered | N/A                                             | N/A              | N/A |  |
| <i>Imaging Studies</i>                                |    |                                                                                                                       |                    |     |                         |                                                                      |                                                                      |                                                            |                                                               |                                              |                                                                                                                                                       |                                                              |                                                 |                  |     |  |
| Bohon and Stice (2012)                                | 26 | N/A                                                                                                                   | 13                 | N/A | 13                      | 20.3±1.87                                                            | 23.6±2.6                                                             | 4% Hispanic, 80% Caucasian, 12% Asian, 4% African American | 100%                                                          | Completed Eating Diagnostic interview; DSM-V | Assessed with Eating Disorder Diagnostic Interview                                                                                                    | N/A                                                          | N/A                                             | N/A              | N/A |  |
| Frank et al. (2006)                                   | 16 | 0                                                                                                                     | 10 (all recovered) | 0   | 6                       | Bulimia Nervosa-Restrictor: 27.5±7;<br>Control: 22±2                 | Bulimia Nervosa-Restrictor: 22±3;<br>Control: 21±2                   | N/A                                                        | 100                                                           | N/A                                          | N/A                                                                                                                                                   | Not reported                                                 | >=1 year; 45±60 months (range of 12-180 months) | N/A              | N/A |  |
| Frank, Reynolds, Shott, and O'Reilly (2011)           | 43 | 0                                                                                                                     | 20                 | 0   | 23                      | BN: 25.2±5.3;<br>Control: 27.2±6.4                                   | Bulimia Nervosa: 22.6±5.7;<br>Control: 21.5±1.2                      | N/A                                                        | 100                                                           | DSM-IV                                       | Healthy                                                                                                                                               | N/A                                                          | N/A                                             | 74.2±63.7 Months | N/A |  |
| Frank et al. (2012)                                   | 63 | 21                                                                                                                    | 0                  | 0   | 19 Obese;<br>23 Control | Control: 24.8±5.6;<br>Anorexia Nervosa: 22.5±5.8;<br>Obese: 27.1±6.7 | Control: 21.5±1.4;<br>Anorexia Nervosa: 16.1±1.1;<br>Obese: 34.7±4.9 | N/A                                                        | 100                                                           | DSM-IV                                       | Obese: BMI≥30 kg/m2, no psychiatric disorder, not taking medication;<br>Control: Healthy                                                              | N/A                                                          | N/A                                             | N/A              | N/A |  |

|                                            |    |                                                                   |    |   |                                  |                                                                                                                                         |                                                                                                                 |     |      |        |                                                                                                             |                                                                                               |         |         |          |
|--------------------------------------------|----|-------------------------------------------------------------------|----|---|----------------------------------|-----------------------------------------------------------------------------------------------------------------------------------------|-----------------------------------------------------------------------------------------------------------------|-----|------|--------|-------------------------------------------------------------------------------------------------------------|-----------------------------------------------------------------------------------------------|---------|---------|----------|
| Frank, Shott, Hagman, and Yang (2013)      | 41 | Anorexia Nervosa (Adolescents): 19; Anorexia Nervosa (adults): 19 | 0  | 0 | Control: 22 Control (Adults): 24 | Anorexia Nervosa (Adolescents): 15.4±1.4; Control(Adolescents): 14.8±1.8; Anorexia Nervosa Adults: 23.1±5.8; Control (Adults): 27.4±6.3 | Anorexia Nervosa- (Adolescents): 16.2±1.1; Control (Adolescents): 21.3±1.9                                      | N/A | 100% | DSM-IV | Healthy                                                                                                     | N/A                                                                                           | N/A     | N/A     | N/A      |
| Frank, Shott, and Mittal (2013)            | 86 | Anorexia Nervosa: 19; Anorexia Nervosa-Restrictor: 24             | 19 | 0 | 24                               | Control: 27.4±6.4; Anorexia Nervosa: 23.1±5.8; Anorexia Nervosa-Restrictor: 30.3±8.1; Bulimia Nervosa: 25.2±5.3                         | Control: 21.6±1.3; Anorexia Nervosa: 16.0±1.1; Anorexia Nervosa-Restrictor: 20.8±2.4; Bulimia Nervosa: 22.6±5.7 | N/A | 100  | DSM-IV | No history of head trauma, neurological disease, major medical illness, psychotic or substance use disorder | ≥1-year normal weight for height, menstrual cycles, exercise, and food intake                 | N/A     | N/A     | N/A      |
| Frank, Collier, Shott, and O'Reilly (2016) | 48 | 24 (recovered)                                                    | 0  | 0 | 24                               | Anorexia Nervosa-Restrictor: 30.3±8.1; Control: 27.4±6.3                                                                                | Anorexia Nervosa-Restrictor: 20.8±2.4; Control: 21.6±1.3                                                        | N/A | 100  | DSM-IV | N/A                                                                                                         | Healthy body weight (18.5-24.9), menstrual cycle, exercise regime, and food intake for 1 year | 7.9±6.0 | 5.9±5.2 | 16.6±2.4 |

|                                           |     |                    |    |   |                                      |                                                                                                                                    |                                                                                                                                    |     |      |         |                                                                                                                                                                                                                                                                |                                                                     |     |                                                     |                                                       |
|-------------------------------------------|-----|--------------------|----|---|--------------------------------------|------------------------------------------------------------------------------------------------------------------------------------|------------------------------------------------------------------------------------------------------------------------------------|-----|------|---------|----------------------------------------------------------------------------------------------------------------------------------------------------------------------------------------------------------------------------------------------------------------|---------------------------------------------------------------------|-----|-----------------------------------------------------|-------------------------------------------------------|
| Frank, Shott, Riederer, and Pryor (2016)  | 77  | 26                 | 25 | 0 | 26                                   | Control: 24.4±3.5; Anorexia Nervosa: 23.2±5.3; Bulimia Nervosa: 24.6±4.2                                                           | Control: 21.6±1.2; Anorexia Nervosa: 16.2±1.1; Bulimia Nervosa: 23.6±5.9                                                           | N/A | 100  | DSM- IV | Without history of head trauma, neurological disease, major medical illness, psychosis or substance-use disorders                                                                                                                                              | N/A                                                                 | N/A | Anorexia Nervosa: 6.6±5.7; Bulimia Nervosa: 7.1±4.5 | N/A                                                   |
| Frank, Shott, Keffler, and Cornier (2016) | 106 | 21; 19 (Recovered) | 20 | 0 | 27 Healthy Control; 19 Obese Control | Control: 26.2±7.0; Anorexia Nervosa: 23.1±6.1; Anorexia Nervosa-R restrictor: 27.0±5.3; Bulimia Nervosa: 25.2±5.3; Obese: 28.2±8.1 | Control: 21.5±1.4; Anorexia Nervosa: 16.0±1.1; Bulimia Nervosa: 22.6±5.7; Obese: 34.7±4.6; Anorexia Nervosa-R restrictor: 20.2±1.1 | N/A | 100% | DSM-IV  | No history of psychiatric or major medical illness, were not taking medication, and were within normal BMI range life long                                                                                                                                     | Normal weight, regular menses, normal exercise patterns for ≥1 year | N/A | N/A                                                 | N/A                                                   |
| Monteleone et al. (2017)                  | 60  | 20                 | 20 | 0 | 20                                   | Control: 27.1±4.7; AN=25.5±7.8; Bulimia Nervosa: 27.7±8.0                                                                          | Control: 21.0±1.5; AN: 17.3±1.0; Bulimia Nervosa: 21.8±2.6                                                                         | N/A | 100  | DSM-V   | No history of eating disorders; age ≥18 years; no psychopharmacological treatment during the preceding 6 weeks; no history of neurological or medical diseases and drug abuse dependence; no history of head trauma with loss of consciousness; no concomitant | N/A                                                                 | N/A | Anorexia Nervosa: 7.6±6.7; Bulimia Nervosa: 8.8±6.1 | Anorexia Nervosa: 16.5±2.8; Bulimia Nervosa: 18.3±4.0 |

|                           |    |                    |                |   |    |                                                                                                |                                                                                                |     |     |        | comorbid axis I psychiatric disorders                                                                                                                                                                               |                                                                                                                                                                                                                                                                     |                                                                                                        |                                                                           |          |
|---------------------------|----|--------------------|----------------|---|----|------------------------------------------------------------------------------------------------|------------------------------------------------------------------------------------------------|-----|-----|--------|---------------------------------------------------------------------------------------------------------------------------------------------------------------------------------------------------------------------|---------------------------------------------------------------------------------------------------------------------------------------------------------------------------------------------------------------------------------------------------------------------|--------------------------------------------------------------------------------------------------------|---------------------------------------------------------------------------|----------|
| Oberndorfer et al. (2013) | 42 | 14 (recovered)     | 14 (recovered) | 0 | 14 | Control: 27.4±5.5; Anorexia Nervosa-Restrictor: 27.3±1.4; Bulimia Nervosa-Restrictor: 26.6±5.7 | Control: 22.6±1.5; Anorexia Nervosa-Restrictor: 21.5±2.8; Bulimia Nervosa-Restrictor: 22.9±2.1 | N/A | 100 | DSM-IV | No history of an eating disorder or other psychiatric disorder; no history of serious medical or neurological illness; no first-degree relatives with an eating disorder; within normal weight range since menarche | No restrictive eating or other eating disorder related behaviors in the preceding year; stable weight between 90% and 120% anorexic body weight for at least 1 year; regular menstrual cycles for 1 year; normal plasma b-hydroxybutyric acid, glucose, and insulin | Anorexia Nervosa-Restrictor =5.0±1.6; Bulimia Nervosa-Restrictor: 22.7±1.3                             | Anorexia-Nervosa-Restrictor: 8.2±1.7; Bulimia Nervosa-Restrictor: 8.0±5.9 | N/A      |
| Radeloff et al. (2014)    | 47 | 15 (all recovered) | 14 (recovered) | 0 | 18 | Control: 24.7±3.1; Anorexia Nervosa-Restrictor: 25.2±4.0; Bulimia Nervosa-Restrictor: 24.5±2.4 | Control: 21.5±1.8; Anorexia Nervosa-Restrictor: 21.0±2.4; Bulimia Nervosa-Restrictor: 20.6±2.1 | N/A | 100 | DSM-IV | No history of an eating disorder or any psychiatric, serious medical or neurological illness; no first-degree relatives with an eating disorder; normal menstrual cycles; normal                                    | Normal BMI; regular menstrual cycles; not engaged in pathological eating behavior                                                                                                                                                                                   | >=1 year; Anorexia Nervosa-Restrictor: 72.4±31.3 months); Bulimia Nervosa-Restrictor: 41.1±28.0 months | N/A                                                                       | Includes |

---

weight range  
since menarche;  
no medication

---

|                                        |    |                           |     |     |             |                                                                                                                                                            |                                                |     |      |        |         |     |     |     |     |
|----------------------------------------|----|---------------------------|-----|-----|-------------|------------------------------------------------------------------------------------------------------------------------------------------------------------|------------------------------------------------|-----|------|--------|---------|-----|-----|-----|-----|
| Toth,<br>Kondakor,<br>et al.<br>(2004) | 19 | Anorexia<br>Nervosa:<br>9 | N/A | N/A | Control: 10 | Anorexia<br>Nervosa: No<br>mean, Range<br>was 18-30,<br>No Standard<br>Deviation<br>Healthy<br>Control:<br>Range was<br>18-27, No<br>Standard<br>Deviation | N/A,<br>mentioned<br>being<br>normal<br>weight | N/A | 100% | DSM-IV | Healthy | N/A | N/A | N/A | N/A |
|----------------------------------------|----|---------------------------|-----|-----|-------------|------------------------------------------------------------------------------------------------------------------------------------------------------------|------------------------------------------------|-----|------|--------|---------|-----|-----|-----|-----|

---

|                                 |    |                |     |     |                |                                                                                                                                                   |     |     |        |     |                             |     |     |     |     |
|---------------------------------|----|----------------|-----|-----|----------------|---------------------------------------------------------------------------------------------------------------------------------------------------|-----|-----|--------|-----|-----------------------------|-----|-----|-----|-----|
| Toth, Tury,<br>et al.<br>(2004) | 18 | 9 (7<br>women) | N/A | N/A | 9 (4<br>women) | Anorexia<br>Nervosa:<br>Range was<br>18-30, No<br>Standard<br>Deviation<br>Healthy<br>Control:<br>Range was<br>18-27, No<br>Standard<br>Deviation | N/A | N/A | 61.10% | N/A | Healthy college<br>students | N/A | N/A | N/A | N/A |
|---------------------------------|----|----------------|-----|-----|----------------|---------------------------------------------------------------------------------------------------------------------------------------------------|-----|-----|--------|-----|-----------------------------|-----|-----|-----|-----|

---



|                                                         |    |                |   |   |    |                                                          |                                                          |     |     |           |                                                                                                                                                                                                        |                                                                                                                                                                |                  |     |          |
|---------------------------------------------------------|----|----------------|---|---|----|----------------------------------------------------------|----------------------------------------------------------|-----|-----|-----------|--------------------------------------------------------------------------------------------------------------------------------------------------------------------------------------------------------|----------------------------------------------------------------------------------------------------------------------------------------------------------------|------------------|-----|----------|
| Vocks, Herpertz, Rosenberger, Senf, and Gizewski (2011) | 24 | 12             | 0 | 0 | 12 | Anorexia Nervosa: 27.4±10.6; Control: 25.3±3.6           | Anorexia Nervosa: 14.1±1.8; Control: 21.4±1.6            | N/A | 100 | DSM-IV-TR | Controls have no current or past mental or physical disorder                                                                                                                                           | N/A                                                                                                                                                            | N/A              | N/A | N/A      |
| Wagner et al. (2008)                                    | 32 | 16 (recovered) | 0 | 0 | 16 | Control: 26.8±6.3; Anorexia Nervosa-Restrictor: 26.4±6.2 | Control: 22.9±2.2; Anorexia Nervosa-Restrictor: 20.7±2.2 | N/A | 100 | DSM-IV    | No history of an eating disorder or any psychiatric, serious medical, or neurological illness; no first-degree relative with an eating disorder; normal weight since menarche; normal menstrual cycles | Weight >90% anorexic body weight; regular menstrual cycles; have not binged, purged, or engaged in significant restrictive eating patterns for at least 1 year | 45.7±30.2 months | N/A | Includes |

|                      |    |                    |                |   |    |                                                                                                |                                                                                                |     |     |     |                                                                                                                                                              |                                                                                                                                                                                                                                                    |                                                                                             |     |          |
|----------------------|----|--------------------|----------------|---|----|------------------------------------------------------------------------------------------------|------------------------------------------------------------------------------------------------|-----|-----|-----|--------------------------------------------------------------------------------------------------------------------------------------------------------------|----------------------------------------------------------------------------------------------------------------------------------------------------------------------------------------------------------------------------------------------------|---------------------------------------------------------------------------------------------|-----|----------|
| Wagner et al. (2015) | 42 | 14 (all recovered) | 15 (recovered) | 0 | 13 | Control: 26.3±5.9; Anorexia Nervosa-Restrictor: 26.4±5.4; Bulimia Nervosa-Restrictor: 27.4±6.8 | Control: 22.4±1.5; Anorexia Nervosa-Restrictor: 20.9±2.8; Bulimia Nervosa-Restrictor: 22.5±2.0 | N/A | 100 | N/A | No history of an eating disorder or any psychiatric or neurological illness; no first-degree relatives with an eating disorder; normal weight since menarche | No restrictive eating or other eating disorder related behaviors in the preceding year; stable weight between 90% and 120% ABW for at least 1 year; regular menstrual cycles for 1 year; normal plasma b-hydroxybutyric acid, glucose, and insulin | Anorexia Nervosa-Restrictor: 58.4±69.4 months; Bulimia Nervosa-Restrictor: 44.3±47.2 months | N/A | Includes |
|----------------------|----|--------------------|----------------|---|----|------------------------------------------------------------------------------------------------|------------------------------------------------------------------------------------------------|-----|-----|-----|--------------------------------------------------------------------------------------------------------------------------------------------------------------|----------------------------------------------------------------------------------------------------------------------------------------------------------------------------------------------------------------------------------------------------|---------------------------------------------------------------------------------------------|-----|----------|

**Table S2.** Study characteristics from the reviewed literature

| Citation                      | Study Design             | Study Methodology | Study's Primary Purpose                                                                                                                                                                                                | Taste                               |                                     |                                                             |                             |                                                   | Taste Test Conducted                                                                                          | Fasted | Satiated | Whole mouth vs localized |
|-------------------------------|--------------------------|-------------------|------------------------------------------------------------------------------------------------------------------------------------------------------------------------------------------------------------------------|-------------------------------------|-------------------------------------|-------------------------------------------------------------|-----------------------------|---------------------------------------------------|---------------------------------------------------------------------------------------------------------------|--------|----------|--------------------------|
|                               |                          |                   |                                                                                                                                                                                                                        | Sweet                               | Salty                               | Bitter                                                      | Umami                       | Other stimulus                                    |                                                                                                               |        |          |                          |
| <i>Psychophysical Studies</i> |                          |                   |                                                                                                                                                                                                                        |                                     |                                     |                                                             |                             |                                                   |                                                                                                               |        |          |                          |
| Arlt et al. (2017)            | Cross-sectional          | Psychophysical    | To show interaction between weight status and Binge Eating Disorder. Additionally, to show differences in taste perception from non-eating disorder matched groups.                                                    | Sucrose: 2.5% and 5%                | N/A                                 | 6-n-propylthiouracil (PROP): 0.11%                          | N/A                         | N/A                                               | NIH Toolbox Gustatory Assessment (tests for whole mouth and regional taste sensitivity) & Edible Taste Strips | N/A    | N/A      | Regional and whole mouth |
| Aschenbrenner et al. (2008)   | Longitudinal Prospective | Psychophysical    | To employ detailed olfactory and gustatory testing in female subjects of three homogenous groups – anorexia nervosa, bulimia nervosa and healthy controls – and to look at the effects of treatment on these measures. | Sucrose (g/ml): 0.4, 0.2, 0.1, 0.05 | NaCl (g/ml): 0.25, 0.1, 0.04, 0.016 | Quinine Hydrochloride (g/ml): 0.006, 0.0024, 0.0009, 0.0004 | N/A                         | Sour - Citric Acid (g/ml): 0.3, 0.165, 0.09, 0.05 | Taste strips and taste identification                                                                         | N/A    | N/A      | Whole mouth              |
| Birmingham et al. (2005)      | Cross-sectional          | Psychophysical    | To measure taste acuity of patients with Eating Disorders (Anorexia Nervosa, Bulimia Nervosa, and Eating Disorders Not Otherwise Specified) by identifying taste and describing                                        | N/A                                 | Standardized salt solution          | Standardized bitter solution                                | Standardized umami solution | N/A                                               | AccuSens Taste Kit - Taste acuity                                                                             | N/A    | N/A      | Whole mouth              |

|                                     |                    |                |                                                                                                                                                 |                                                                  |                                        |                                                                |     |                                                                                                         |                                                         |                |                                                                     |                                                          |
|-------------------------------------|--------------------|----------------|-------------------------------------------------------------------------------------------------------------------------------------------------|------------------------------------------------------------------|----------------------------------------|----------------------------------------------------------------|-----|---------------------------------------------------------------------------------------------------------|---------------------------------------------------------|----------------|---------------------------------------------------------------------|----------------------------------------------------------|
|                                     |                    |                | strength of solution                                                                                                                            |                                                                  |                                        |                                                                |     |                                                                                                         |                                                         |                |                                                                     |                                                          |
| Blazer et al. (2008)                | Cross-sectional    | Psychophysical | To clarify whether taste and smell dysfunctions are specific or part of a pattern of sensory-perceptual deficits in Bulimia Nervosa patients.   | Sucrose: 1%, 0.5%, and 0.025%                                    | NaCl: 1%, 0.5%, and 0.025%             | N/A                                                            | N/A | Citric Acid: 1%, 0.5%, and 0.025%; Urea: 1%, 0.5%, and 0.025%                                           | Taste intensity and hedonic response                    | N/A            | N/A                                                                 | N/A                                                      |
| Bossert et al. (1991)               | Pre/Post Treatment | Psychophysical | To see if bulimics and anorexics have higher palatability ratings to low calorie food images than controls                                      | N/A                                                              | N/A                                    | N/A                                                            | N/A | Viewing time of high calorie and low-calorie images                                                     | Taste preference                                        | N/A            | N/A                                                                 | N/A                                                      |
| Dalton and Finlayson (2014)         | Cross-sectional    | Psychophysical | To measure implicit and explicit liking in relation to hedonics.                                                                                | Photographs of high-fat sweets and low-fat sweets were presented | N/A                                    | N/A                                                            | N/A | Photographs of savory foods that are low fat and high fat were presented                                | Leeds Food Preference Questionnaire                     | Fasted         | Yes                                                                 | N/A                                                      |
| Dazzi et al. (2013)                 | Cross-sectional    | Psychophysical | To assess olfactory and gustatory function impairment in patients with eating disorders                                                         | Glucose (g/ml): 0.4, 0.2, 0.1 and 0.05                           | NaCl (g/ml): 0.25, 0.1, 0.04 and 0.016 | Quinine Hydrochloride (g/ml): 0.006, 0.0024, 0.0009 and 0.0004 | N/A | Citric Acid (g/ml): 0.3, 0.165, 0.09 and 0.05                                                           | Taste detection using taste strip kit                   | N/A            | N/A                                                                 | Anterior third of the right and left sides of the tongue |
| Drewnowski, Bellisle, et al. (1987) | Cross-sectional    | Psychophysical | To assess taste responses of normal-weight bulimics with those of normal weight control women                                                   | Sucrose: 1%, 5%, 10%, 20%, and 40%                               | N/A                                    | N/A                                                            | N/A | Fat (grams): 0, 3, 7 of fat per 100 grams of product                                                    | Taste and spit; hedonic response rated on 9-point scale | N/A            | Participants were fed standard breakfast three hours before testing | Whole mouth                                              |
| Drewnowski, Halmi, et al. (1987)    | Pre/Post Treatment | Psychophysical | To examine the influence of body weight gain on taste responsiveness, anorectic patients were studied both at admission and following return to | Sucrose in each sample of dairy product: 0%, 5%, 10%, and 20%    | N/A                                    | N/A                                                            | N/A | Fat: skim milk-0.1, milk- 3.5, half and half-10.5, Heavy Cream-37.6, Cream and oil-52.6 grams/100 grams | Taste and spit; hedonic response rated on 9-point scale | Overnight fast | N/A                                                                 | Whole mouth                                              |

---

target body weight"

---

|                          |                       |                |                                                                                                                                                                                                                                                                        |                                    |     |     |     |                                                                                                 |                                                                           |                |     |             |
|--------------------------|-----------------------|----------------|------------------------------------------------------------------------------------------------------------------------------------------------------------------------------------------------------------------------------------------------------------------------|------------------------------------|-----|-----|-----|-------------------------------------------------------------------------------------------------|---------------------------------------------------------------------------|----------------|-----|-------------|
| Drewnowski et al. (1992) | Pre/post Experimental | Psychophysical | To examine effects of opioids on taste preferences and food consumption patterns in compulsive binge eaters and in normal-weight female controls                                                                                                                       | Sucrose: 2%, 4%, 8%, 16%, and 32%  | N/A | N/A | N/A | Fat: 3%, 10%, 20%, and 35% fat content                                                          | Food consumption; hedonic response                                        | Overnight fast | N/A | Whole mouth |
| Drewnowski et al. (1995) | Experimental          | Psychophysical | To test hypothesis that endogenous opiate peptides selectively influence hedonic response to sweet and high-fat foods, the opiate antagonist naloxone, opiate agonist butorphanol, and a saline placebo were administered by IV to 16 obese and 25 normal-weight women | Sucrose: 2%, 4%, 8%, 16%, and 32%  | N/A | N/A | N/A | Fat: whole milk (3.5%), half and half (10% fat), light cream (20% fat), and heavy fat (36% fat) | Taste and spit; hedonic response rated on 9-point scale                   | Overnight fast | N/A | Whole mouth |
| Eiber et al. (2002)      | Experimental          | Psychophysical | To compare the hedonic responses to sucrose solutions in bulimics, restrictive anorexics and Anorectic-Bulimic women (ns20ygroup) in two different conditions: sucrose solution swallowed vs. sucrose solution spit.                                                   | Sucrose; 0%, 5%, 10%, 20%, and 40% | N/A | N/A | N/A | N/A                                                                                             | Solutions swallowed; solutions spit; Hedonic response and taste threshold | N/A            | N/A | Whole mouth |

---

|                             |                 |                |                                                                                                                                                                                                                                                                                    |                                                  |                                        |                                                                |                                                |                                              |                                              |     |                                                                           |             |
|-----------------------------|-----------------|----------------|------------------------------------------------------------------------------------------------------------------------------------------------------------------------------------------------------------------------------------------------------------------------------------|--------------------------------------------------|----------------------------------------|----------------------------------------------------------------|------------------------------------------------|----------------------------------------------|----------------------------------------------|-----|---------------------------------------------------------------------------|-------------|
| Franko et al. (1994)        | Cross-sectional | Psychophysical | To examine sweet taste intensity and pleasantness in Bulimia Nervosa patients                                                                                                                                                                                                      | Sucrose: 0%, 1.3%, 2.6%, 5%, 10%, 20%, and 40%   | N/A                                    | N/A                                                            | N/A                                            | N/A                                          | Sip and spit; intensity and hedonic response | N/A | Participants consumed standardized breakfast prior to study               | Whole mouth |
| Goldzak-Kunik et al. (2012) | Cross-sectional | Psychophysical | To examine sensory-perceptual function in a battery of tests that were designed to establish whether the pattern of sensory dysfunction reported in Anorexia Nervosa patients is indeed primarily related to eating, hunger, and body size or whether it is a general dysfunction. | Sucrose (mM): 3.2, 9.7, 29.2, 87.6, 262.9, 788.7 | NaCl (mM): 2.5, 10, 40, 160, 640, 2560 | Quinine Hydrochloride (mM): 0.01, 0.02, 0.04, 0.09, 0.18, 0.35 | MSG (mmol/L): 0.6, 1.8, 5.9, 17.7, 53.2, 159.7 | Citric Acid (mmol/L): 1,3,10,30, 93, and 280 | Sip and spit; hedonic response               | N/A | N/A                                                                       | Whole mouth |
| Jirik-Babb and Katz (1988)  | Cross-sectional | Psychophysical | To examine taste perception and intensity of sucrose, hydrochloride, NaCl, and quinine hydrochloride between controls and patients with Eating disorders (Anorexia Nervosa and Bulimia)                                                                                            | Sucrose (log M): -1.5, -1.0, -0.5, 0.0           | NaCl (log M): -3.0, -2.0, -1.0, 0.0    | Quinine Hydrochloride (log M): -5.0, -4.0, -3.0                | N/A                                            | HCl (log M): -3.0, -2.0, -1.5                | Sip and spit; Taste identification           | N/A | N/A                                                                       | Whole mouth |
| Klein et al. (2010)         | Cross-sectional | Psychophysical | To study taste preferences (namely orosensory stimulation) between bulimics and healthy women                                                                                                                                                                                      | Aspartame: 0%, 0.01%, 0.03%, 0.08%, 0.28%        | N/A                                    | N/A                                                            | N/A                                            | N/A                                          | Taste preference                             | N/A | Participants were fed ~300 kcal three to four hours before the experiment | Whole mouth |

|                        |                    |                |                                                                                                                                                                                                                                                                                        |                                                                                                                                 |                                     |                                        |     |                                              |                                                     |        |     |                                                                                                                                     |
|------------------------|--------------------|----------------|----------------------------------------------------------------------------------------------------------------------------------------------------------------------------------------------------------------------------------------------------------------------------------------|---------------------------------------------------------------------------------------------------------------------------------|-------------------------------------|----------------------------------------|-----|----------------------------------------------|-----------------------------------------------------|--------|-----|-------------------------------------------------------------------------------------------------------------------------------------|
| Lacey et al. (1977)    | Cross-sectional    | Psychophysical | To examine the sweetness taste sensitivity in patients with Anorexia Nervosa.                                                                                                                                                                                                          | Sucrose: Five different concentrations were used but only 0.175% sucrose by weight was found to be in the region of uncertainty | N/A                                 | N/A                                    | N/A | N/A                                          | Sip and spit; Taste sensitivity                     | Fasted | No  | Whole mouth                                                                                                                         |
| Nakai et al. (1987)    | Cross-sectional    | Psychophysical | To examine the taste function in patients with Anorexia Nervosa and Bulimia Nervosa.                                                                                                                                                                                                   | Sucrose: 0.3%, 2.5%, 10%, 20%, and 80%                                                                                          | NaCl: 0.3%, 1.25%, 5%, 10%, and 20% | Quinine: 0.001%, 0.02%, 0.1%, 0.5%, 4% | N/A | Sour - Tartrate: 0.02%, 0.2%, 2%, 4%, and 8% | Detection and recognition; filter paper disc method | N/A    | N/A | Whole mouth                                                                                                                         |
| Nozoe et al. (1996)    | Cross-sectional    | Psychophysical | To monitor the taste sensitivity of nine Anorexia Nervosa patients on admission to hospital and during subsequent behavioral treatment.                                                                                                                                                | Sucrose: 0.3%, 2.5%, 10%, 20%, 80%                                                                                              | NaCl: 0.3%, 1.25%, 5%, 10%, and 20% | Quinine: 0.001%, 0.02%, 0.1%, 0.5%, 4% | N/A | Sour - Tartrate: 0.02, 0.2, 2, 4, and 8%     | Detection and recognition; filter paper disc method | N/A    | N/A | Measurements were obtained from six sites on the right and left sides of the anterior and posterior lingual region, and soft palate |
| Peterson et al. (2016) | Quasi-experimental | Psychophysical | To compare profiles of hunger, fullness, olfactory, and gustatory responses in adolescent females (n = 15) with newly diagnosed restrictive eating disorders at hospital admission (i.e., severe malnutrition) and after medical refeeding, in comparison to healthy controls (n = 15) | N/A                                                                                                                             | N/A                                 | N/A                                    | N/A | N/A                                          | Pleasant/unpleasant taste                           | N/A    | N/A | N/A                                                                                                                                 |

|                           |                 |                |                                                                                                                                                                                                                                                                                                                                                                                                                                                     |                                                               |                                 |                                                            |     |                                                                              |                                  |                             |                              |                     |
|---------------------------|-----------------|----------------|-----------------------------------------------------------------------------------------------------------------------------------------------------------------------------------------------------------------------------------------------------------------------------------------------------------------------------------------------------------------------------------------------------------------------------------------------------|---------------------------------------------------------------|---------------------------------|------------------------------------------------------------|-----|------------------------------------------------------------------------------|----------------------------------|-----------------------------|------------------------------|---------------------|
| Pierce et al. (1989)      | Cross-sectional | Psychophysical | To examine the relationship between preference for sweetness or fat in a taste test and the patients' reported food preferences                                                                                                                                                                                                                                                                                                                     | Sucrose in each sample of dairy product: 0%, 5%, 10%, and 20% | N/A                             | N/A                                                        | N/A | Fat: 0.1%, 3.5%, 10.5%, 37.6%, 52.6%                                         | Hedonic preference               | N/A                         | N/A                          | N/A                 |
| Rodin et al. (1990)       | Cross-sectional | Psychophysical | "To assess how the tongue and palate may be influenced by repeated contact with the acid in vomit, researchers in this study conducted specific spatial testing of various mouth regions. In order to determine whether disturbances in the perceived intensity or pleasantness of taste distinguish bulimics from normal subjects, subjects were asked to rate several solutions representing the four basic tastes—sweet, salty, sour and bitter" | Sucrose (M): 1, 0.32, 0.1, 0.032                              | NaCl (M): 1.0, 0.32, 0.1, 0.032 | Quinine Hydrochloride (M): 0.001, 0.00032, 0.0001, 0.00032 | N/A | Sour - Citric Acid (M): 0.001, 0.00032, 0.0001, 0.00032                      | Sip and spit; hedonic response   | Overnight fast              | N/A                          | Palate, back, front |
| Schebendach et al. (2014) | Cross-sectional | Psychophysical | To compare blinded ratings of the fat content of fat-free, low fat, and regular cream cheese in patients with Anorexia Nervosa and in normal controls.                                                                                                                                                                                                                                                                                              | N/A                                                           | N/A                             | N/A                                                        | N/A | Fat: Fat free, low fat, regular (0, 6, and 9 g fat per wt. oz. respectively) | Recognition thresholds           | N/A                         | Yes; 2 hrs after lunch       | Whole mouth         |
| Simon et al. (1993)       | Cross-sectional | Psychophysical | To see if taste preferences are an accurate index of body weight 'set                                                                                                                                                                                                                                                                                                                                                                               | Sucrose: 1%, 5%, 10%, 20%, and 40%                            | N/A                             | N/A                                                        | N/A | Fat: soft white cheese containing 0, 3, and 7 grams of                       | Taste and spit; taste preference | Tested after overnight fast | Tested two hours after lunch | Whole mouth         |



|                                    |                    |                |                                                                                                                                                                                                                                                                                                                                                                          |                         |     |     |     |                                                                                                                                                                                                           |                                |                |     |             |
|------------------------------------|--------------------|----------------|--------------------------------------------------------------------------------------------------------------------------------------------------------------------------------------------------------------------------------------------------------------------------------------------------------------------------------------------------------------------------|-------------------------|-----|-----|-----|-----------------------------------------------------------------------------------------------------------------------------------------------------------------------------------------------------------|--------------------------------|----------------|-----|-------------|
|                                    |                    |                | point'. Hypothesis is that anorectic women should find sucrose solutions acceptable even after a meal                                                                                                                                                                                                                                                                    |                         |     |     |     | fat per 100 grams                                                                                                                                                                                         |                                |                |     |             |
| S. R. Sunday and Halmi (1990)      | Pre/Post Treatment | Psychophysical | To examine the taste hedonics and intensity ratings in anorectics of the restrictor-type (i.e., those who restrict their intake but do not binge), anorectic-bulimics, normal-weight bulimics, and normal-weight controls offered dairy solutions with varying amounts of fat and sucrose before and after treatment.                                                    | N/A                     | N/A | N/A | N/A | Twenty dairy solutions with four levels of sucrose and five levels of fat were used. The sucrose levels were 0%, 5%, 10%, and 20% wt./wt. The fat levels were 0.1%, 3.5%, 10.5%, 37.6%, and 52.6% wt./wt. | Taste preference               | Overnight fast | No  | Whole mouth |
| Suzanne R. Sunday and Halmi (1991) | Cross-sectional    | Psychophysical | To examine the sensory and hedonic ratings of solutions that vary in fat and sucrose concentration in anorectic, anorectic-bulimic, bulimic, and control subjects. Subjects were tested before and after weight restoration for the anorectics and before and after cessation of bingeing and purging for the bulimics to assess whether sensory responses, preferences, | Sugar: 0%, 5%, 10%, 20% | N/A | N/A | N/A | Fat: 0.1%, 3.5%, 10.5%, 37.6%, 52.6%                                                                                                                                                                      | Sip and spit; hedonic response | Fasted         | N/A | Whole mouth |

and/or aversions are related to the current physiological status of the individual (e.g., body weight) or are stable, trait characteristics of eating disorders.

|                             |                 |                                                |                                                                                                                                                                                                                                                  |                          |                       |                                       |                      |                                                        |                                                               |                |     |             |
|-----------------------------|-----------------|------------------------------------------------|--------------------------------------------------------------------------------------------------------------------------------------------------------------------------------------------------------------------------------------------------|--------------------------|-----------------------|---------------------------------------|----------------------|--------------------------------------------------------|---------------------------------------------------------------|----------------|-----|-------------|
| Szalay et al. (2010)        | Cross-sectional | Psychophysical                                 | To clarify perceptual motivational aspects of gustatory disturbances in Anorexia Nervosa.                                                                                                                                                        | Sucrose (M): 0.1 and 0.5 | NaCl (M): 0.1 and 0.5 | Quinine Hydrochloride (mM): 0.3 and 3 | MSG (M): 0.1 and 0.5 | Complex (pleasant) taste from orange juice: 5% and 25% | Taste Reactivity; sip and spit                                | Fasted 6 hours | No  | Whole mouth |
| <i>Self-Report</i>          |                 |                                                |                                                                                                                                                                                                                                                  |                          |                       |                                       |                      |                                                        |                                                               |                |     |             |
| Brand-Gothelf et al. (2016) | Cross-sectional | Self-report (Sensory Report Questionnaire)     | To assess Sensory Modulation Disorder symptoms with Anorexia Nervosa Restrictors and Bulimia Nervosa in the acute phase of their illness, as well as in adolescent female patients with Anorexia Nervosa Restrictor following weight restoration | N/A                      | N/A                   | N/A                                   | N/A                  | N/A                                                    | N/A                                                           | N/A            | N/A | N/A         |
| Koritar et al. (2017).      | Cross-sectional | Self-report (Health and Taste Attitude Survey) | To establish if eating attitudes related to health concern or taste of food is different or similar in women with Bulimia Nervosa compared to a non-clinical sample and to test if body dissatisfaction is a                                     | N/A                      | N/A                   | N/A                                   | N/A                  | N/A                                                    | No taste test conducted; Health and Taste Attitude Scale used | N/A            | N/A | N/A         |

|                            |                 |                                             |                                                                                                                                                                                                                                                                                |                            |     |     |     |                                                                                                           |                                                                                                                                                          |     |     |             |
|----------------------------|-----------------|---------------------------------------------|--------------------------------------------------------------------------------------------------------------------------------------------------------------------------------------------------------------------------------------------------------------------------------|----------------------------|-----|-----|-----|-----------------------------------------------------------------------------------------------------------|----------------------------------------------------------------------------------------------------------------------------------------------------------|-----|-----|-------------|
|                            |                 |                                             | predictor of these attitudes                                                                                                                                                                                                                                                   |                            |     |     |     |                                                                                                           |                                                                                                                                                          |     |     |             |
| Mitchell et al. (1999)     | Cross-sectional | Self-report (Eating Hedonics Questionnaire) | To examine potential differences in the hedonics of binge eating between female subjects with Bulimia Nervosa (BN) and female subjects with Binge Eating Disorder (BED).                                                                                                       | N/A                        | N/A | N/A | N/A | N/A                                                                                                       | No Taste Test conducted; Eating Hedonics Questionnaire used. Looked at measures such as, "degree to which respondents endorsed pleasurable experiences". | N/A | N/A | N/A         |
| Monje Moreno et al. (2014) | Cross-sectional | Thought-Shape Fusion Questionnaire          | To explore the subjective reactivity after the exposure and tasting of foods with different gradient of sweetness and different fats textures. Thought-Shape fusion cognitive distortion was assessed.                                                                         | Glucose (grams): 0, 40, 80 | N/A | N/A | N/A | Fat: Bread with oil and tomato, bread with tomato mayonnaise and bread with olive oil and tomato meringue | Tasted sweets with different gradient of sweetness and fats with different textures                                                                      | N/A | N/A | Whole mouth |
| Steinglass et al. (2015)   | Cross-sectional | Visual Analog Scale (VAS)                   | To develop a new paradigm for experimentally modeling maladaptive food choice in Anorexia Nervosa. Participants viewed images of various foods on computer screen and indicated strength of preference for food item compared to neutral item; looked at FAT preferences. Also | N/A                        | N/A | N/A | N/A | N/A                                                                                                       | Computer-based Food Choice Task.                                                                                                                         | N/A | N/A | N/A         |

looked at "health" ratings relative to taste.

*Imaging Studies*

|                        |                 |                                                                       |                                                                                                                                                                                                                                                             |                               |     |     |     |                                                               |                                                                                                        |           |                                                                              |             |
|------------------------|-----------------|-----------------------------------------------------------------------|-------------------------------------------------------------------------------------------------------------------------------------------------------------------------------------------------------------------------------------------------------------|-------------------------------|-----|-----|-----|---------------------------------------------------------------|--------------------------------------------------------------------------------------------------------|-----------|------------------------------------------------------------------------------|-------------|
| Bohon and Stice (2012) | Cross-sectional | fMRI; psychophysical interaction analysis (for connectivity analysis) | "To evaluate the effect of negative affect on neural response to anticipation and receipt of palatable food in women with bulimia nervosa (BN) versus healthy controls. Also evaluated connectivity between the amygdala and reward-related brain regions." | N/A                           | N/A | N/A | N/A | N/A                                                           | No taste test conducted; tested anticipation and receipt of chocolate milkshake and tasteless solution | N/A       | N/A                                                                          | N/A         |
| Frank et al. (2006)    | Cross-sectional | fMRI                                                                  | To determine whether bulimic women have alterations in the physiologic response to the blind administration of glucose.                                                                                                                                     | Glucose (M): 1                | N/A | N/A | N/A | Artificial saliva                                             | Pump delivered taste stimuli during fMRI                                                               | Overnight | N/A                                                                          | Whole mouth |
| Frank et al. (2011)    | Cross-sectional | fMRI/psychometrics                                                    | To investigate DA-related responding in a classical conditioning paradigm.                                                                                                                                                                                  | Sucrose: 2%, 4%, 8%, 16%, 1 M | N/A | N/A | N/A | 0% Distilled water; Artificial saliva (25mM KCl, 2 mM NaHCO3) | Taste sensitivity                                                                                      | N/A       | Meal plan breakfast; controls had breakfast matched for quality and calories | Whole mouth |
| Frank et al. (2012)    | Cross-sectional | fMRI/psychometrics                                                    | To test whether there would be brain reward alterations in Anorexia Nervosa, compared with individuals with normal or increased body weight.                                                                                                                | Sucrose: 2%, 4%, 8%, 16%, 1 M | N/A | N/A | N/A | 0% Distilled water; artificial saliva (25mM KCl, 2 mM NaHCO3) | Taste perception                                                                                       | N/A       | Meal plan breakfast; controls had breakfast matched for quality and calories | Whole mouth |

|                                       |                 |                    |                                                                                                                                                                                                        |                               |     |     |     |                                                                                                |                                          |     |                                                                              |             |
|---------------------------------------|-----------------|--------------------|--------------------------------------------------------------------------------------------------------------------------------------------------------------------------------------------------------|-------------------------------|-----|-----|-----|------------------------------------------------------------------------------------------------|------------------------------------------|-----|------------------------------------------------------------------------------|-------------|
| Frank, Shott, Hagman, et al. (2013)   | Cross-Sectional | fMRI/psychometrics | Tested whether brain gray matter (GM) and white matter (WM) in adolescents with Anorexia Nervosa would show alterations comparable to adults.                                                          | Sucrose (M): 1                | N/A | N/A | N/A | Control solution resembling saliva                                                             | N/A                                      | N/A | Meal plan                                                                    | N/A         |
| Frank, Shott, and Mittal (2013)       | Cross-sectional | fMRI/psychometrics | To study gray and white matter volumes in individuals with restricting type currently ill Anorexia Nervosa, recovered Anorexia Nervosa, Bulimia Nervosa, and healthy control women                     | Sucrose: 2%, 4%, 8%, 16%, 1 M | N/A | N/A | N/A | 0% Distilled water; Artificial saliva (25mM KCl, 2 mM NaHCO3)                                  | Taste perception                         | N/A | Meal plan breakfast; controls had breakfast matched for quality and calories | Whole mouth |
| Frank, Collier, et al. (2016)         | Cross-sectional | fMRI/psychometrics | To identify whether higher prediction error brain reward response or sensitivity using the same paradigm is also present in individuals recovered from anorexia nervosa.                               | Sucrose: 2%, 4%, 8%, 16%, 1M  | N/A | N/A | N/A | Water, Artificial saliva (25 mM of potassium chloride, 2mM of sodium bicarbonate)              | Pump delivered taste stimuli during fMRI | N/A | Standardized breakfast                                                       | Whole mouth |
| Frank, Shott, Riederer, et al. (2016) | Cross-sectional | fMRI/psychometrics | To use a multimodal imaging approach to test the hypothesis that individuals ill with anorexia and bulimia nervosa have greater white matter connectivity across the energy homeostasis and cognitive- | Sucrose (M): 1                | N/A | N/A | N/A | No solution, Artificial saliva (also included a conditioned visual stimulus for each solution) | Pump delivered taste stimuli during fMRI | N/A | Standardized breakfast                                                       | Whole mouth |

---

emotional reward  
circuitry.

---

|                                      |                 |                    |                                                                                                                                                                                                                                                                                                                                                                              |                               |     |                                 |     |                                                                        |                                          |                                 |                                                                              |             |
|--------------------------------------|-----------------|--------------------|------------------------------------------------------------------------------------------------------------------------------------------------------------------------------------------------------------------------------------------------------------------------------------------------------------------------------------------------------------------------------|-------------------------------|-----|---------------------------------|-----|------------------------------------------------------------------------|------------------------------------------|---------------------------------|------------------------------------------------------------------------------|-------------|
| Frank, Shott, Keffler, et al. (2016) | Cross-sectional | fMRI/psychometrics | to 1) determine the best model of pattern activation in this region across participants and 2) compare taste classification pattern accuracy between groups, while correcting for potential confounds such as comorbidity, medication use, brain volume, but also interoceptive or taste perception differences, factors that may fluctuate with anxiety and self-restraint. | Sucrose: 2%, 4%, 8%, 16%, 1 M | N/A | N/A                             | N/A | Distilled water; Artificial saliva (25mM KCl, 2mM NaHCO <sub>3</sub> ) | Taste sensitivity                        | Taste stimuli- before breakfast | Meal plan breakfast; controls had breakfast matched for quality and calories | Whole mouth |
| Monteleone et al. (2017)             | Cross-sectional | fMRI/psychometrics | To investigate and contrast the representations of a pleasant (sucrose solution) and an aversive (quinine hydrochloride solution) basic taste in the brain of symptomatic patients with Anorexia Nervosa and Bulimia Nervosa compared to healthy subjects.                                                                                                                   | Sucrose (M): 0.292            | N/A | Quinine Hydrochloride (mM): 0.5 | N/A | Water                                                                  | Pump delivered taste stimuli during fMRI | 6 hours                         | N/A                                                                          | Whole mouth |
| Oberndorfer et al. (2013)            | Cross-sectional | fMRI/self-report   | To use sweet tastes to interrogate gustatory neurocircuitry involving the                                                                                                                                                                                                                                                                                                    | Sucrose; sucralose            | N/A | N/A                             | N/A | N/A                                                                    | Pump delivered taste stimuli during fMRI | N/A                             | Standardized breakfast                                                       | Whole mouth |

---

|                               |                 |                  |                                                                                                                                                                                                                                                                         |                                      |     |                            |     |                                                                                                                                                  |                                                    |                                      |     |             |
|-------------------------------|-----------------|------------------|-------------------------------------------------------------------------------------------------------------------------------------------------------------------------------------------------------------------------------------------------------------------------|--------------------------------------|-----|----------------------------|-----|--------------------------------------------------------------------------------------------------------------------------------------------------|----------------------------------------------------|--------------------------------------|-----|-------------|
|                               |                 |                  | anterior insula and related regions that modulate sensory-interoceptive-reward signals in response to palatable foods.                                                                                                                                                  |                                      |     |                            |     |                                                                                                                                                  |                                                    |                                      |     |             |
| Radeloff et al. (2014)        | Cross-sectional | fMRI/self-report | To investigate neuronal pathways that may contribute to altered fat consumption in eating disordered patients.                                                                                                                                                          | N/A                                  | N/A | N/A                        | N/A | High-fat whipping cream (0.1, 3, 10, 30%); Tasteless thickening agent dissolved in water and sweetened to be comparable to whipping cream; water | Cue and tube delivery of taste stimuli during fMRI | 4 hours after standardized breakfast | N/A | Whole mouth |
| Toth, Kondakor, et al. (2004) | Cross-sectional | EEG              | To investigate the effects of pleasant and unpleasant gustatory stimuli on nonlinear and linear complexity measures of the EEG in healthy controls and in anorexia nervosa patients.                                                                                    | Pleasant (chocolate milk): 4.0 grams | N/A | Unpleasant (bitter): 50 ml | N/A | N/A                                                                                                                                              | EEG and tastant                                    | N/A                                  | N/A | Whole mouth |
| Toth, Tury, et al. (2004)     | Cross-sectional | EEG              | To study was to investigate the effects of pleasant (sweet) and unpleasant (bitter) stimuli on the EEG recorded in healthy persons and Anorexia Nervosa patients in order to elucidate the possibly altered processing mechanisms of these stimuli in Anorexia Nervosa. | Milk Chocolate                       | N/A | Black Tea                  | N/A | N/A                                                                                                                                              | EEG and tastant                                    | N/A                                  | N/A | Whole mouth |

|                      |                 |                  |                                                                                                                                                                  |                              |     |     |     |                                  |                                                          |     |                                                                                                                                               |             |
|----------------------|-----------------|------------------|------------------------------------------------------------------------------------------------------------------------------------------------------------------|------------------------------|-----|-----|-----|----------------------------------|----------------------------------------------------------|-----|-----------------------------------------------------------------------------------------------------------------------------------------------|-------------|
| Vocks et al. (2011)  | Cross-sectional | fMRI/self-report | To examine possible alterations in neuronal correlates of gustatory processing of food stimuli in Anorexia Nervosa and to test the impact of hunger and satiety. | N/A                          | N/A | N/A | N/A | Chocolate milk (1.5% fat); water | Water vs chocolate milk in hungry vs satiated conditions | N/A | Standardized breakfast of 2 slices of toast with butter and jam to be "slightly hungry"; bread rolls with butter and cheese, water until full | Whole mouth |
| Wagner et al. (2008) | Cross-sectional | fMRI/self-report | To determine whether individuals recovered from Anorexia Nervosa have an abnormal physiological response to sugar or water.                                      | Sucrose: 10%                 | N/A | N/A | N/A | Distilled water                  | Pump delivered taste stimuli during fMRI                 | N/A | Standardized breakfast                                                                                                                        | Whole mouth |
| Wagner et al. (2015) | Cross-sectional | fMRI             | To determine whether sensitization effects might underlie pathologic eating behavior when a taste stimulus is administered repeatedly.                           | Sucrose: 10%; sucralose: 10% | N/A | N/A | N/A | N/A                              | Pump delivered taste stimuli during fMRI                 | N/A | Standardized breakfast                                                                                                                        | Whole mouth |



**Table S3.** Study results regarding taste differences among patients with eating disorders and controls

*Anorexia Nervosa*

| Citation                             | Taste(s)      | Preference                                                                         | Pleasantness and Palatability                                             | Detection (Sensitivity and Intensity)                                                                                             | Taste Questionnaire                                                         | Brain Sensory Responsiveness                                                                  | Gustatory Function                    |
|--------------------------------------|---------------|------------------------------------------------------------------------------------|---------------------------------------------------------------------------|-----------------------------------------------------------------------------------------------------------------------------------|-----------------------------------------------------------------------------|-----------------------------------------------------------------------------------------------|---------------------------------------|
| Frank et al. (2012)                  | Sweet         | AN=controls=OB                                                                     | AN=controls=OB regarding pleasantness                                     | AN=controls=OB                                                                                                                    | DNM                                                                         | DNM                                                                                           | DNM                                   |
| Frank, Shott, Hagman, et al. (2013)  | Sweet         | DNM                                                                                | AN < controls regarding orbitofrontal gray matter volume and pleasantness | AN=controls regarding perception                                                                                                  | DNM                                                                         | DNM                                                                                           | DNM                                   |
| Frank, Shott, Keffler, et al. (2016) | Sweet         | AN=controls                                                                        | AN=controls regarding pleasantness                                        | DNM                                                                                                                               | DNM                                                                         | DNM                                                                                           | DNM                                   |
| Goldzak-Kunik et al. (2012)          | DNM           | DNM                                                                                | DNM                                                                       | AN = controls regarding sensitivity                                                                                               | DNM                                                                         | AN had a better response to odor recognition, but less sensitive to auditory and oral stimuli | No difference between AN and controls |
| Lacey et al. (1977)                  | Sweet         | DNM                                                                                | DNM                                                                       | No difference in sucrose sensitivity between AN and controls. Taste sensitivity related to caloric intake in both AN and controls | DNM                                                                         | DNM                                                                                           | DNM                                   |
| Monje Moreno et al. (2014)           | Sweet and fat | AN > controls especially when a less gradient of sweetness was present             | DNM                                                                       | DNM                                                                                                                               | TSF-Questionnaire – AN > controls (sweet). AN < controls (pre-fats testing) | DNM                                                                                           | DNM                                   |
| Nozoe et al. (1996)                  | DNM           | DNM                                                                                | DNM                                                                       | DNM                                                                                                                               | DNM                                                                         | AN < controls when admitted, but slightly increased during treatment                          | DNM                                   |
| Schebendach et al. (2014)            | Fat           | DNM                                                                                | DNM                                                                       | DNM                                                                                                                               | DNM                                                                         | DNM                                                                                           | No difference between AN and controls |
| Simon et al. (1993)                  | Sweet and fat | Preference for sweet did not differ between AN and controls<br>AN < controls (fat) | DNM                                                                       | AN=controls (sweet) regarding perception                                                                                          | DNM                                                                         | DNM                                                                                           | DNM                                   |

|                               |                         |                           |                                      |     |                                 |                                                                                                                                   |     |
|-------------------------------|-------------------------|---------------------------|--------------------------------------|-----|---------------------------------|-----------------------------------------------------------------------------------------------------------------------------------|-----|
| Steinglass et al. (2015)      | Fat                     | AN preferred low-fat food | DNM                                  | DNM | Computer-based Food Choice Task | DNM                                                                                                                               | DNM |
| Szalay et al. (2010)          | Pleasantness            | DNM                       | AN < controls regarding pleasantness | DNM | DNM                             | DNM                                                                                                                               | DNM |
| Toth, Kondakor, et al. (2004) | Pleasantness and bitter | DNM                       | DNM                                  | DNM | DNM                             | AN < controls regarding dimensional complexity                                                                                    | DNM |
| Toth, Tury, et al. (2004)     | Sweet and bitter        | DNM                       | DNM                                  | DNM | DNM                             | Pattern of activation in AN differed from controls                                                                                | DNM |
| Vocks et al. (2011)           | DNM                     | DNM                       | DNM                                  | DNM | DNM                             | Differences in activation of the amygdala, insula, and temporal gyrus were seen between AN and controls during hunger and satiety | DNM |

*Bulimia Nervosa*

|                                     |                               |                                          |                                                                                                                  |                                                                                                                |                                                    |                                             |               |
|-------------------------------------|-------------------------------|------------------------------------------|------------------------------------------------------------------------------------------------------------------|----------------------------------------------------------------------------------------------------------------|----------------------------------------------------|---------------------------------------------|---------------|
| Blazer et al. (2008)                | Salt, sweet, sour, and bitter | DNM                                      | BN<control (salt);<br>BN=control (sweet);<br>BN=control (sour);<br>BN=control (bitter)<br>regarding pleasantness | BN<control (salt);<br>BN=control (sweet);<br>BN=control (sour);<br>BN=control (bitter)<br>regarding perception | BN-related questionnaires                          | DNM                                         | DNM           |
| Bohon and Stice (2012)              | DNM                           | DNM                                      | DNM                                                                                                              | DNM                                                                                                            | DNM                                                | BN > controls regarding amygdala activation | BN < controls |
| Drewnowski, Bellisle, et al. (1987) | Sweet and fat                 | BN > control regarding optimal sweetness | DNM                                                                                                              | BN=control regarding perception                                                                                | DNM                                                | DNM                                         | DNM           |
| Franko et al. (1994)                | Sweet                         | DNM                                      | DNM                                                                                                              | BN=control regarding intensity                                                                                 | DNM                                                | DNM                                         | DNM           |
| Frank et al. (2011)                 | Sweet                         | BN=controls                              | BN=controls regarding pleasantness                                                                               | BN > controls regarding sensitivity to reward and punishment                                                   | Sensitivity to Reward and Punishment Questionnaire | BN < control                                | DNM           |
| Klein et al. (2010)                 | Sweet                         | BN=controls                              | DNM                                                                                                              | Participants with BN had 40.5-53.1% greater intake than controls                                               | DNM                                                | BN=controls                                 | DNM           |

|                                  |                                |                                                                                                                                     |                                                              |                                                                                  |                                                                                                |     |                                              |
|----------------------------------|--------------------------------|-------------------------------------------------------------------------------------------------------------------------------------|--------------------------------------------------------------|----------------------------------------------------------------------------------|------------------------------------------------------------------------------------------------|-----|----------------------------------------------|
| Koritar et al. (2017).           | DNM                            | DNM                                                                                                                                 | Controls > BN regarding pleasantness                         | Participants with BN had higher reference for "light" products                   | Health and Taste Attitude Scale. Controls > BN (Taste Domain)<br>BN > controls (Health Domain) | DNM | DNM                                          |
| Pierce et al. (1989)             | Sweet and fat                  | BN < controls when high fat diet was not masked by sweetness. AN < controls regarding low carb/high fat and high carb/low fat diets | DNM                                                          | No difference between BN, AN, and controls regarding intensity for sweet and fat | DNM                                                                                            | DNM | DNM                                          |
| Rodin et al. (1990)              | Sweet, salty, bitter, and sour | BN < controls (sweet)                                                                                                               | No difference between BN and controls regarding pleasantness | No difference between BN and controls regarding intensity                        | DNM                                                                                            | DNM | DNM                                          |
| <i>Binge Eating Disorder</i>     |                                |                                                                                                                                     |                                                              |                                                                                  |                                                                                                |     |                                              |
| Arlt et al. (2017)               | Sweet and bitter               | DNM                                                                                                                                 | DNM                                                          | Overweight BED < controls and normal-weight BED regarding perception             | DNM                                                                                            | DNM | DNM                                          |
| Dalton and Finlayson (2014)      | Sweet and fat                  | BED > controls regarding preference and wanting of high-fat sweet foods                                                             | DNM                                                          | DNM                                                                              | Binge Eating Scale. High-scorer's intake > low-scorer's intake                                 | DNM | DNM                                          |
| Drewnowski et al. (1992)         | Sweet and fat                  | Preference decreased in BED and controls due to Naloxone                                                                            | DNM                                                          | DNM                                                                              | DNM                                                                                            | DNM | DNM                                          |
| Drewnowski et al. (1995)         | Sweet and fat                  | Naloxone caused suppression of sweet and high-fat foods only in BED                                                                 | DNM                                                          | DNM                                                                              | DNM                                                                                            | DNM | DNM                                          |
| <i>Multiple Eating Disorders</i> |                                |                                                                                                                                     |                                                              |                                                                                  |                                                                                                |     |                                              |
| Aschenbrenner et al. (2008)      | DNM                            | DNM                                                                                                                                 | DNM                                                          | DNM                                                                              | DNM                                                                                            | DNM | Controls > BN > AN. Improved over time in AN |
| Bossert et al. (1991)            | DNM                            | AN did not prefer high-caloric foods                                                                                                | BN and AN < controls regarding palatability                  | DNM                                                                              | DNM                                                                                            | DNM | DNM                                          |

|                                       |                         |                                                                                                      |                                                                                                           |                                                                                                                |                                          |                                              |                      |
|---------------------------------------|-------------------------|------------------------------------------------------------------------------------------------------|-----------------------------------------------------------------------------------------------------------|----------------------------------------------------------------------------------------------------------------|------------------------------------------|----------------------------------------------|----------------------|
| Brand-Gothelf et al. (2016)           | DNM                     | DNM                                                                                                  | DNM                                                                                                       | DNM                                                                                                            | SRQ Taste/Gustatory – AN > BN + controls | AN (ill and weight restored) > BN + controls | DNM                  |
| Dazzi et al. (2013)                   | Bitter                  | DNM                                                                                                  | DNM                                                                                                       | AN and BN < control (bitter) regarding perception                                                              | DNM                                      | DNM                                          | AN and BN < controls |
| Drewnowski, Halmi, et al. (1987)      | Sweet and fat           | BN > control regarding sweet preference<br>AN and BN < controls regarding high-fat                   | AN=BN=control regarding pleasantness                                                                      | AN=BN=control regarding perception                                                                             | DNM                                      | DNM                                          | DNM                  |
| Eiber et al. (2002)                   | Sweet                   | Taste hedonics was dependent on whether participants with AN, RAN, or BN swallowed or spit solutions | DNM                                                                                                       | DNM                                                                                                            | DNM                                      | DNM                                          | DNM                  |
| Frank, Shott, Riederer, et al. (2016) | Sweet                   | DNM                                                                                                  | AN=BN=control regarding pleasantness                                                                      | AN=BN=control regarding perception                                                                             | DNM                                      | DNM                                          | DNM                  |
| Jirik-Babb and Katz (1988)            | Sweet, salt, and bitter | DNM                                                                                                  | DNM                                                                                                       | Magnitude of AN and BN < controls. Gustatory sensitivity associated with abnormal eating behavior in AN and BN | DNM                                      | DNM                                          | DNM                  |
| Mitchell et al. (1999)                | DNM                     | DNM                                                                                                  | BED < BN regarding physical discomfort while consuming foods. BED > BN regarding food enjoyment and taste | DNM                                                                                                            | Eating Hedonics Questionnaire            | DNM                                          | DNM                  |
| Monteleone et al. (2017)              | Sweet and bitter        | DNM                                                                                                  | AN=BN=control regarding pleasantness                                                                      | AN=BN=control                                                                                                  | DNM                                      | AN and BN < controls regarding bitter taste  | DNM                  |

|                                                     |                         |                                              |                                                        |     |     |     |                                                                                             |
|-----------------------------------------------------|-------------------------|----------------------------------------------|--------------------------------------------------------|-----|-----|-----|---------------------------------------------------------------------------------------------|
| Nakai et al. (1987)                                 | Sweet, salt, and bitter | DNM                                          | DNM                                                    | DNM | DNM | DNM | Taste function increased in AN and BN                                                       |
| Radeloff et al. (2014)                              | Fat                     | DNM                                          | DNM                                                    | DNM | DNM | DNM | BN > AN and controls regarding magnitude of response                                        |
| S. R. Sunday and Halmi (1990)                       | Sweet and fat           | DNM                                          | DNM                                                    | DNM | DNM | DNM | BN > AN and controls during treatment regarding ratings of low-fat and sugar-free solutions |
| Suzanne R. Sunday and Halmi (1991)                  | Sweet and fat           | AN differed from controls in hedonic ratings | DNM                                                    | DNM | DNM | DNM | No difference between AN, BN, and controls regarding sweet and fat taste                    |
| <i>Eating Disorder Not Specified</i>                |                         |                                              |                                                        |     |     |     |                                                                                             |
| Peterson et al. (2016)                              | DNM                     | DNM                                          | Participants with ED < controls regarding pleasantness | DNM | DNM | DNM | DNM                                                                                         |
| <i>Recovered Anorexia Nervosa</i>                   |                         |                                              |                                                        |     |     |     |                                                                                             |
| Frank, Collier, et al. (2016)                       | Sweet                   | RAN=controls                                 | RAN=controls regarding pleasantness                    | DNM | DNM | DNM | DNM                                                                                         |
| Wagner et al. (2008)                                | DNM                     | DNM                                          | DNM                                                    | DNM | DNM | DNM | AN < controls regarding activation of insula                                                |
| <i>Recovered Bulimia Nervosa</i>                    |                         |                                              |                                                        |     |     |     |                                                                                             |
| Frank et al. (2006)                                 | Sweet                   | DNM                                          | DNM                                                    | DNM | DNM | DNM | RBN < control regarding activation of anterior cingulate cortex                             |
| <i>Remitted/Recovered Multiple Eating Disorders</i> |                         |                                              |                                                        |     |     |     |                                                                                             |
| Frank, Shott, and Mittal (2013)                     | Sweet                   | AN > RAN                                     | AN=BN=control regarding pleasantness                   | DNM | DNM | DNM | DNM                                                                                         |
| Frank, Shott, Keffler, et al. (2016)                | Sweet                   | AN=BN=OB=RAN=controls                        | AN=BN=OB=RAN=controls regarding pleasantness           | DNM | DNM | DNM | DNM                                                                                         |
| Oberndorfer et al. (2013)                           | DNM                     | DNM                                          | DNM                                                    | DNM | DNM | DNM | RAN < RBN regarding sweet taste                                                             |
| Radeloff et al. (2014)                              | Fat                     | DNM                                          | DNM                                                    | DNM | DNM | DNM | RBN > RAN and controls regarding magnitude of response                                      |
| Wagner et al. (2015)                                | Sweet                   | DNM                                          | DNM                                                    | DNM | DNM | DNM | RAN < RBN regarding sensitivity                                                             |

---

**Legend:** AN = Anorexia Nervosa; BN = Bulimia Nervosa; BED = Binge Eating Disorder; OB = Obesity; DNM = Did not measure; RAN = Remitted Anorexia Nervosa; RBN = Remitted Bulimia Nervosa; Gustatory Function = Studies that did measure taste preference and detection, but accounted for taste function

---
